# Supplementary material for: Transcriptome Analysis Identifies Tumor Immune Microenvironment Signaling Networks Supporting Metastatic Castration-Resistant Prostate Cancer
Source: MDPI journal article supplement (doi:10.3390/onco3020007), 2023-04-10
Supplement: s1 [file s1]

Job name: EPIC\_results\_mCRPC  
 Bulk data: data\_mRNA\_seq\_fpkms\_capture\_v02-clean.txt  
 Reference pr Tumor infiltrating cells  
 Fraction is: cell fractions

| sampleID    | Bcells   | CAFs   | CD4_Tcells | CD8_Tcells | Endothelial | Macrophage: |
|-------------|----------|--------|------------|------------|-------------|-------------|
| TP_2077_Tur | 2.00E-04 | 0      | 6.00E-04   | 0.0301     | 1.00E-04    | 0           |
| TP_2078_Tur | 0        | 0      | 1.00E-04   | 0          | 0           | 0           |
| SC_9056_T   | 0        | 0      | 0          | 0          | 0           | 0           |
| SC_9136_Tur | 0        | 0.8762 | 0          | 0          | 0.0311      | 0.0715      |
| SC_9137_Tur | 2.00E-04 | 0.1962 | 0          | 0          | 0           | 0           |
| SC_9138_Tur | 0        | 0.3547 | 0          | 1.00E-04   | 0           | 2.00E-04    |
| SC_9139_Tur | 0        | 0      | 0          | 0          | 0           | 0           |
| SC_9140_Tur | 0.0281   | 0.234  | 0.0708     | 0.038      | 0           | 0.0018      |
| SC_9141_Tur | 0.0978   | 0.5313 | 0.1301     | 3.00E-04   | 0.1789      | 0.0616      |
| SC_9142_Tur | 1.00E-04 | 0      | 1.00E-04   | 0          | 0           | 0           |
| TP_2079_Tur | 0        | 0.1798 | 0.0203     | 0          | 0.0206      | 0.0151      |
| MO_1469_T   | 0.0492   | 0.0641 | 0.1918     | 0.0119     | 0           | 0.0244      |
| TP_2081_T   | 0.1871   | 0      | 0.536      | 0.2126     | 0.0639      | 0           |
| SC_9074_T   | 0        | 0      | 1.00E-04   | 0.0237     | 0.9761      | 0           |
| SC_9086_T   | 0.067    | 0      | 1.00E-04   | 0.0574     | 0           | 0           |
| SC_9145_Tur | 0.0856   | 0.3896 | 0.3056     | 0.0778     | 0.1166      | 0.0248      |
| SC_9148_Tur | 0.0394   | 0.3583 | 0          | 4.00E-04   | 0           | 0.0137      |
| SC_9144_Tur | 0.0254   | 0      | 0.1066     | 0.0332     | 0.0162      | 0.0189      |
| SC_9150_Tur | 0        | 0      | 0.0139     | 0.0508     | 0.0013      | 0           |
| SC_9151_Tur | 0.045    | 0.0727 | 0.1411     | 0.0395     | 0           | 1.00E-04    |
| SC_9152_Tur | 0.0506   | 0.328  | 0.1358     | 0          | 0.0641      | 0           |
| SC_9153_Tur | 0.0873   | 0.2389 | 0.1269     | 0          | 0.1192      | 0.04        |
| MO_1473_T   | 0.1498   | 0      | 0.555      | 0.1834     | 9.00E-04    | 0.0147      |
| TP_2093_T   | 0        | 0      | 0          | 0          | 0           | 0           |
| TP_2096_T   | 0        | 0      | 1.00E-04   | 0          | 1.00E-04    | 0           |
| SC_9156_Tur | 0.077    | 0.1705 | 0.3125     | 0.0623     | 0           | 0.0425      |
| SI_9157_Tun | 1.00E-04 | 0.1931 | 0          | 0          | 0           | 0.036       |
| SC_9162_Tur | 0.083    | 0.2566 | 0.2787     | 0.067      | 0.1304      | 0           |
| SC_9163_Tur | 0.1846   | 0      | 0          | 1.00E-04   | 0           | 6.00E-04    |
| SC_9165_Tur | 0        | 0      | 4.00E-04   | 5.00E-04   | 0           | 0           |
| SC_9158_Tur | 0        | 0      | 0          | 0          | 0           | 0.0152      |
| SC_9170_Tur | 0.0571   | 0      | 0.0998     | 0.1441     | 1.00E-04    | 0.0147      |
| SC_9171_Tur | 0        | 0.4878 | 0          | 0          | 0           | 0.0305      |
| SC_9027_T   | 0        | 0      | 0          | 1.00E-04   | 0           | 0           |
| SC_9175_T   | 1.00E-04 | 0      | 0.1386     | 0.0305     | 0.0096      | 0           |
| SC_9172_Tur | 0        | 0.206  | 0          | 2.00E-04   | 0           | 0.0148      |
| SC_9173_Tur | 2.00E-04 | 0      | 0.2944     | 0.3842     | 0           | 0           |

|            |          |        |          |          |          |          |
|------------|----------|--------|----------|----------|----------|----------|
| MO_1492_T  | 0        | 0      | 0        | 0        | 0.0072   | 0        |
| MO_1490_T  | 0.0217   | 0      | 0.4917   | 0.2511   | 0.228    | 0.0075   |
| MO_1499_T  | 0.1749   | 0      | 0.5024   | 0.2181   | 0.0409   | 0.0636   |
| MO_1510_T  | 0.0607   | 0.8019 | 0        | 0        | 0.0261   | 0.107    |
| MO_1511_T  | 0        | 0.2535 | 0        | 0        | 0.0593   | 0        |
| MO_1514_T  | 0.7939   | 0      | 0.0045   | 0.0132   | 0.1726   | 8.00E-04 |
| MO_1517_T  | 0        | 0      | 0        | 0        | 0.0013   | 0        |
| SC_9176_T  | 0        | 0      | 0        | 0.002    | 0        | 0        |
| SC_9178_T  | 0.1084   | 0      | 0        | 0        | 0        | 0.023    |
| SC_9177_T  | 0.0392   | 0      | 0.0204   | 7.00E-04 | 0        | 0.0141   |
| SC_9179_T  | 0        | 0.5515 | 7.00E-04 | 0        | 0        | 0.0508   |
| SC_9146_T  | 0        | 0      | 0        | 2.00E-04 | 0        | 0.0224   |
| SC_9182_T  | 0        | 1      | 0        | 0        | 0        | 0        |
| MO_1482_T  | 0.0701   | 0.4806 | 0.2344   | 0.003    | 0.1686   | 0.0432   |
| MO_1541_T  | 4.00E-04 | 0      | 0        | 0        | 0        | 0        |
| MO_1543_T  | 0.0206   | 0      | 0        | 0.001    | 0        | 0.6511   |
| SC_9184_T  | 0        | 0      | 3.00E-04 | 0        | 0        | 0.9997   |
| SC_9186_T  | 0        | 0      | 0.0849   | 0.3808   | 1.00E-04 | 0        |
| SC_9187_T  | 0        | 0      | 8.00E-04 | 0.0013   | 0        | 0        |
| SC_9189_T  | 0        | 0      | 0.0014   | 0.0059   | 0        | 0        |
| SC_9190_T  | 0.098    | 0.1083 | 0.3944   | 0.1088   | 0.043    | 3.00E-04 |
| SC_9192_T  | 0.0692   | 0      | 0        | 0.0016   | 0.0461   | 0.0161   |
| SC_9194_T  | 0        | 0      | 1.00E-04 | 0        | 0        | 0        |
| SC_9033_T  | 0.0702   | 0      | 0.1851   | 0.0582   | 0.1905   | 0.0327   |
| SC_9193_T  | 0.055    | 0.4738 | 0.2788   | 0.046    | 0.1085   | 0.0281   |
| SC_9195_T  | 0.0772   | 0      | 0.231    | 0.1095   | 0.0606   | 0        |
| MO_1553_T  | 0.1148   | 0.7214 | 0        | 0        | 0        | 0.1535   |
| MO_1556_T  | 0        | 0      | 0        | 0        | 0        | 0        |
| SC_9069_T  | 0        | 0      | 0.2004   | 0.0409   | 0.5566   | 0.1918   |
| SC_9120_T  | 0.3239   | 0.3419 | 0.0155   | 0.0098   | 0.3074   | 0        |
| SC_9196_T  | 0.1265   | 0.6593 | 2.00E-04 | 0.0461   | 0.0495   | 0.0996   |
| SC_9197_T  | 0.0638   | 0      | 0.1835   | 1.00E-04 | 0        | 0        |
| SC_9199_T  | 0.0085   | 0      | 0        | 0        | 0        | 0        |
| SC_9201_T  | 3.00E-04 | 0      | 0        | 0        | 0.0458   | 0        |
| SC_9200_T  | 0        | 0.9994 | 0        | 6.00E-04 | 0        | 0        |
| SC_9203_T  | 0.0591   | 0      | 0.0012   | 0.0621   | 0        | 0.042    |
| SC_9204_T  | 0.0299   | 0.2554 | 0.1829   | 0.0053   | 0.0572   | 0        |
| MO_1015.Tu | 0        | 0      | 0        | 0        | 0.0061   | 0        |
| MO_1040.Tu | 0        | 0.5147 | 0        | 0        | 0        | 0.0495   |
| MO_1054.Tu | 0.0217   | 0.1899 | 0        | 0        | 0        | 0.0325   |
| MO_1071.Tu | 0.0309   | 0.5574 | 0        | 0        | 0        | 0.0683   |
| MO_1074.Tu | 0.051    | 0      | 0        | 0.05     | 0        | 0        |
| MO_1008.Tu | 0.0251   | 0      | 0.8539   | 0.0518   | 0.0687   | 0        |

|             |          |        |          |          |          |          |
|-------------|----------|--------|----------|----------|----------|----------|
| MO_1084.Tu  | 2.00E-04 | 0.7934 | 0        | 0        | 0.1244   | 0.082    |
| MO_1094.Tu  | 0.0349   | 0.1453 | 0        | 0        | 0.0386   | 0.0047   |
| SC_9001.Tun | 0.0347   | 0.1489 | 0.1441   | 0        | 0.0369   | 0.0153   |
| MO_1095.Tu  | 0.0314   | 0.3102 | 0        | 0        | 0.0153   | 0        |
| MO_1096.Tu  | 0.0765   | 0      | 0.3499   | 0.2444   | 0.3176   | 0        |
| TP_2001.Tun | 0.0115   | 0.5669 | 0        | 0        | 0.117    | 0.0508   |
| SC_9008.Tun | 0        | 1      | 0        | 0        | 0        | 0        |
| SC_9009.Tun | 0.0279   | 0.4391 | 0        | 0        | 0        | 0.0285   |
| SC_9010.Tun | 0        | 1      | 0        | 0        | 0        | 0        |
| TP_2010.Tun | 0.0304   | 0.6447 | 0        | 0        | 0        | 0.085    |
| SC_9003.Tun | 0.0045   | 0.1244 | 2.00E-04 | 0        | 0.0459   | 0.0051   |
| SC_9005.Tun | 0.0644   | 0.3736 | 0        | 1.00E-04 | 0        | 0.0336   |
| TP_2009.Tun | 0.0382   | 0      | 0        | 0        | 0        | 0        |
| SC_9007.Tun | 0        | 0.5645 | 0        | 0        | 8.00E-04 | 0        |
| SC_9011.Tun | 7.00E-04 | 0      | 0.3372   | 0        | 0.0205   | 9.00E-04 |
| SC_9012.Tun | 0        | 0      | 0        | 0        | 4.00E-04 | 0.1167   |
| MO_1114.Tu  | 0        | 0      | 0        | 0        | 0.2209   | 0        |
| MO_1118.Tu  | 0.1202   | 0.6721 | 0.0271   | 0.0058   | 0.1697   | 0        |
| MO_1124.Tu  | 0.0723   | 0.4599 | 0        | 0        | 0.1084   | 0.0556   |
| MO_1130.Tu  | 0        | 0.3295 | 0.5431   | 0.0166   | 0.0344   | 0        |
| SC_9016.Tun | 0.3539   | 0      | 0.0229   | 0.0024   | 0        | 0.6208   |
| SC_9017.Tun | 0.0026   | 0.9827 | 5.00E-04 | 0.0124   | 5.00E-04 | 1.00E-04 |
| SC_9019.Tun | 0.2383   | 0      | 4.00E-04 | 0        | 1.00E-04 | 0        |
| SC_9020.Tun | 0.0406   | 0      | 0.2697   | 0.5161   | 0.0029   | 0.1707   |
| SC_9021.Tun | 0.0218   | 0      | 0        | 0        | 0        | 0.0155   |
| SC_9022.Tun | 0.06     | 0.2433 | 0        | 0        | 0        | 0.0316   |
| SC_9023.Tun | 0.0582   | 0      | 0        | 0        | 0.1016   | 0.0489   |
| SC_9024.Tun | 0.0251   | 0.4659 | 0        | 0        | 0        | 0.0304   |
| TP_2020.Tun | 0        | 0.9999 | 1.00E-04 | 0        | 0        | 0        |
| SC_9026.Tun | 0.0666   | 0      | 0        | 0        | 0.1477   | 0.0566   |
| SC_9027.Tun | 3.00E-04 | 0.042  | 0.0312   | 0.0022   | 0.299    | 0.0386   |
| SC_9028.Tun | 0.0205   | 0      | 0.0065   | 0.1445   | 0        | 0.0146   |
| SC_9029.Tun | 0        | 0      | 0.0615   | 0.0078   | 0        | 0        |
| TP_2032.Tun | 0.2718   | 0      | 0.2908   | 0.2711   | 0        | 0.0935   |
| SC_9030.Tun | 0        | 0      | 0        | 3.00E-04 | 0        | 0        |
| SC_9039.Tun | 0.055    | 0.2483 | 0.0726   | 0        | 0.1149   | 0.0239   |
| MO_1161.Tu  | 0        | 1      | 0        | 0        | 0        | 0        |
| MO_1162.Tu  | 0.0493   | 0      | 0.0857   | 0.1231   | 0.2051   | 0.0092   |
| SC_9032.Tun | 2.00E-04 | 0      | 3.00E-04 | 0        | 0        | 0        |
| SC_9034.Tun | 0.0446   | 0      | 0        | 0.0033   | 2.00E-04 | 0.0123   |
| SC_9036.Tun | 0.4496   | 0      | 0.3177   | 0.0676   | 0.044    | 0.0262   |
| SC_9037.Tun | 0        | 0      | 1.00E-04 | 0        | 1.00E-04 | 0.2149   |
| SC_9018.Tun | 0        | 0.9991 | 0        | 0        | 6.00E-04 | 1.00E-04 |

|             |          |        |          |          |          |          |
|-------------|----------|--------|----------|----------|----------|----------|
| SC_9035.Tun | 0        | 0      | 0.2221   | 0.082    | 0.2566   | 0        |
| SC_9043.Tun | 0.0791   | 0      | 0.114    | 0.0288   | 0        | 0.0052   |
| MO_1176.Tu  | 1.00E-04 | 0      | 1.00E-04 | 0        | 0        | 0        |
| MO_1179.Tu  | 0.004    | 0      | 4.00E-04 | 0        | 1.00E-04 | 0        |
| MO_1184.Tu  | 0.0853   | 0      | 0.2023   | 0.1072   | 0        | 0        |
| SC_9046.Tun | 0        | 0      | 0.2814   | 0.1944   | 0.0049   | 0.4847   |
| SC_9047.Tun | 0        | 0.7267 | 0.0153   | 0.0309   | 0.1323   | 0.0102   |
| SC_9048.Tun | 0        | 0.5597 | 0.0984   | 0        | 0.214    | 0.1278   |
| SC_9049.Tun | 0        | 0      | 0.0012   | 0.0059   | 0.028    | 0        |
| MO_1192.Tu  | 1.00E-04 | 0.8454 | 0        | 0        | 0        | 0.1445   |
| SC_9050.Tun | 0.1016   | 0.631  | 0.17     | 0.034    | 0        | 0.0627   |
| SC_9054.Tun | 0.0036   | 0      | 0.1982   | 0.0809   | 0        | 5.00E-04 |
| SC_9055.Tun | 0.001    | 0.3914 | 0        | 0        | 0        | 0.0196   |
| SC_9056.Tun | 0.0573   | 0      | 0.0151   | 0.0492   | 0        | 0.0187   |
| MO_1215.Tu  | 0.0378   | 0.2213 | 0.0982   | 0.0155   | 0.0459   | 0.0033   |
| MO_1219.Tu  | 0.0058   | 0      | 0.1321   | 0        | 0        | 6.00E-04 |
| MO_1221.Tu  | 0.0169   | 0.1843 | 0.0546   | 0        | 0.0389   | 0.015    |
| MO_1232.Tu  | 0.1826   | 0      | 0.56     | 0.1481   | 5.00E-04 | 0.1087   |
| SC_9057.Tun | 0.0332   | 0.3382 | 0        | 0        | 0.1008   | 0.0478   |
| SC_9058.Tun | 0        | 0.9993 | 0        | 0        | 4.00E-04 | 1.00E-04 |
| SC_9059.Tun | 0.0356   | 0.8189 | 0        | 3.00E-04 | 0.0363   | 0.104    |
| SC_9060.Tun | 0.2436   | 0.4124 | 0        | 0        | 0        | 0        |
| MO_1241.Tu  | 0        | 0.9997 | 2.00E-04 | 0        | 0        | 0        |
| MO_1244.Tu  | 0        | 0      | 8.00E-04 | 0.0028   | 0        | 0        |
| MO_1249.Tu  | 0.3161   | 0      | 0.0295   | 0.0057   | 0.4491   | 0.1996   |
| MO_1262.Tu  | 0.0016   | 0      | 0.6188   | 0.1355   | 0.2436   | 0        |
| MO_1263.Tu  | 0        | 0      | 0        | 0        | 0        | 0        |
| SC_9061.Tun | 0.0626   | 0      | 1.00E-04 | 0.0092   | 0.2377   | 0        |
| SC_9062.Tun | 0.08     | 0      | 1.00E-04 | 0        | 0        | 0        |
| SC_9063.Tun | 0        | 0.9998 | 1.00E-04 | 0        | 0        | 0        |
| MO_1202.Tu  | 0.076    | 0      | 0.143    | 0.1004   | 0.1417   | 0.0289   |
| MO_1277.Tu  | 0        | 0.121  | 0        | 0        | 1.00E-04 | 0        |
| SC_9016_T   | 0.1079   | 0.0951 | 0.0769   | 1.00E-04 | 0        | 0.0187   |
| SC_9065.Tun | 0.3307   | 0      | 0.0815   | 0.4931   | 0.0086   | 0.0361   |
| SC_9066.Tun | 0        | 0      | 0.0305   | 0.0244   | 0.0429   | 0.0179   |
| SC_9068.Tun | 0.0284   | 0.1194 | 0.0972   | 0.0273   | 0.0889   | 0.0373   |
| SC_9071.TM  | 0.0645   | 0      | 2.00E-04 | 0.0799   | 0.0317   | 0.0094   |
| SC_9072.TM  | 0        | 0      | 0        | 0        | 0        | 0        |
| TP_2034.Tun | 0.0031   | 0      | 0.0974   | 0.034    | 0.093    | 0.0138   |
| SC_9073.TM  | 0        | 1      | 0        | 0        | 0        | 0        |
| TP_2054.TM  | 0        | 0.3977 | 0.098    | 0.0217   | 0        | 7.00E-04 |
| SC_9076.TM  | 0.0864   | 0      | 0.13     | 1.00E-04 | 0        | 0        |
| MO_1316.Tu  | 0.0018   | 0      | 0.6034   | 0.3945   | 1.00E-04 | 0        |

|             |          |          |          |          |          |          |
|-------------|----------|----------|----------|----------|----------|----------|
| SC_9005_T   | 0.0918   | 0.6474   | 0.0278   | 0        | 0        | 0        |
| SC_9080.TM  | 0.0718   | 0.5165   | 0        | 0        | 0.0408   | 0.0408   |
| SC_9081.TM  | 0        | 1        | 0        | 0        | 0        | 0        |
| SC_9082.TM  | 0        | 0        | 0        | 0        | 0.0878   | 0.0425   |
| SC_9065.TM  | 0        | 0.1207   | 1.00E-04 | 0        | 0        | 0        |
| SC_9083.TM  | 0.1255   | 0        | 0.4065   | 0.1341   | 0.0173   | 0.0569   |
| SC_9084.TM  | 0        | 0.9304   | 1.00E-04 | 0        | 0        | 0.0694   |
| SC_9031.TM  | 0.0552   | 0.2047   | 0.1223   | 0.0184   | 0.07     | 0        |
| MO_1336.TM  | 0.0493   | 0        | 0.5204   | 0.1754   | 0.1871   | 0.0678   |
| MO_1337.TM  | 0.2993   | 0.3746   | 0        | 0        | 0.2335   | 0.0709   |
| MO_1339.TM  | 0.0756   | 0.8464   | 0        | 0        | 0        | 0.0692   |
| SC_9086.TM  | 0.0839   | 0        | 6.00E-04 | 1.00E-04 | 4.00E-04 | 0.0135   |
| SC_9089.TM  | 6.00E-04 | 0        | 0.3766   | 0.1216   | 0        | 0        |
| SC_9090_T   | 0        | 0        | 0.123    | 1.00E-04 | 0        | 0        |
| SC_9091.TM  | 0        | 0        | 0        | 1.00E-04 | 0        | 0        |
| TP_2060.TM  | 0.006    | 0        | 0.6754   | 0        | 1.00E-04 | 0.2979   |
| TP_2061.TM  | 0        | 0        | 2.00E-04 | 0        | 0.0385   | 0.0744   |
| TP_2064.TM  | 0.0552   | 0        | 0.1779   | 0.0421   | 0        | 0.0116   |
| SC_9092.TM  | 0.1853   | 0        | 0.6299   | 0.1128   | 0.0718   | 0        |
| SC_9093.TM  | 0        | 0        | 0        | 0        | 0.0527   | 0        |
| SC_9097.TM  | 1.00E-04 | 0        | 0.4134   | 0.1451   | 0        | 0        |
| SC_9094.Tun | 0.0031   | 0.98     | 0        | 0        | 0        | 0.0064   |
| SC_9099.Tun | 0.0011   | 0        | 0.5102   | 0.4856   | 0        | 0        |
| SC_9100.Tun | 0.0437   | 0        | 3.00E-04 | 0        | 6.00E-04 | 0.9549   |
| SC_9035_T   | 0        | 0.9764   | 0        | 0        | 0        | 0.0236   |
| SC_9096.Tun | 0        | 0.0537   | 0.0289   | 0        | 0.0173   | 0.0131   |
| SC_9103.Tun | 0        | 0.0166   | 0        | 0        | 1.00E-04 | 0        |
| SC_9104.Tun | 1.00E-04 | 0.8744   | 0        | 0        | 1.00E-04 | 0        |
| SC_9107.Tun | 0        | 1.00E-04 | 0        | 0        | 0        | 0.1404   |
| SC_9109.Tun | 6.00E-04 | 0        | 0        | 0.0012   | 2.00E-04 | 0        |
| MO_1410.Tu  | 0        | 0        | 0        | 0        | 0        | 0.1131   |
| SC_9105_Tur | 0        | 0.6049   | 0        | 2.00E-04 | 0        | 0.0249   |
| SC_9118_Tur | 0        | 0        | 0.0026   | 0        | 0.8751   | 0.1183   |
| MO_1420_Tu  | 0.0192   | 0.9394   | 0        | 0        | 7.00E-04 | 0.0394   |
| MO_1421_Tu  | 0.0304   | 0        | 0.0015   | 0.1028   | 0        | 0        |
| TP_2069_Tur | 2.00E-04 | 0.3657   | 0        | 0        | 0.0545   | 0        |
| SC_9121_Tur | 0.0727   | 0        | 0.0555   | 0.1136   | 1.00E-04 | 0        |
| SC_9123_Tur | 1.00E-04 | 0        | 0        | 1.00E-04 | 0.1615   | 0.8383   |
| MO_1443_T   | 0.0914   | 0        | 0.0014   | 0.0242   | 0        | 1.00E-04 |
| SC_9124_Tur | 2.00E-04 | 0        | 1.00E-04 | 1.00E-04 | 2.00E-04 | 0        |
| SC_9126_Tur | 0.0103   | 0.2892   | 0.0424   | 0        | 0.0688   | 0.0065   |
| SC_9129_Tur | 0        | 0.5204   | 0        | 0        | 0        | 0        |
| SC_9132_Tur | 0        | 0        | 0.3235   | 0.1395   | 0        | 0        |

|            |        |        |        |        |        |          |
|------------|--------|--------|--------|--------|--------|----------|
| MO_1447_Ti | 0      | 0      | 0.2452 | 0.0737 | 0      | 1.00E-04 |
| MO_1446_T  | 0.0043 | 0.1938 | 0.0779 | 0      | 0.002  | 0.0159   |
| MO_1460_Ti | 0.0359 | 0.007  | 0.1421 | 0.1114 | 0.1032 | 0.0057   |

| NKcells  | Tumour_cells |
|----------|--------------|
| 7.00E-04 | 0.9683       |
| 0        | 0.9998       |
| 0        | 1            |
| 0        | 0.0212       |
| 0        | 0.8036       |
| 0        | 0.645        |
| 0        | 0.9999       |
| 0        | 0.6274       |
| 0        | 0            |
| 0        | 0.9997       |
| 0        | 0.7641       |
| 1.00E-04 | 0.6586       |
| 0        | 4.00E-04     |
| 1.00E-04 | 0            |
| 2.00E-04 | 0.8752       |
| 0        | 1.00E-04     |
| 9.00E-04 | 0.5874       |
| 0        | 0.7996       |
| 0.006    | 0.928        |
| 0        | 0.7016       |
| 0        | 0.4215       |
| 0.0019   | 0.3858       |
| 0        | 0.0963       |
| 0        | 0.9999       |
| 0        | 0.9998       |
| 0        | 0.3351       |
| 0        | 0.7708       |
| 0        | 0.1842       |
| 0        | 0.8147       |
| 0        | 0.9991       |
| 1.00E-04 | 0.9847       |
| 0        | 0.6841       |
| 0        | 0.4817       |
| 0        | 0.9999       |
| 4.00E-04 | 0.8209       |
| 0        | 0.779        |
| 0.0058   | 0.3154       |

|          |          |
|----------|----------|
| 0        | 0.9927   |
| 0        | 0        |
| 0        | 0        |
| 0.0042   | 1.00E-04 |
| 0.0013   | 0.6859   |
| 0.0152   | 0        |
| 0        | 0.9987   |
| 0        | 0.998    |
| 0        | 0.8686   |
| 0.004    | 0.9216   |
| 0        | 0.3969   |
| 0.0041   | 0.9733   |
| 0        | 0        |
| 0        | 0        |
| 0        | 0.9996   |
| 0.014    | 0.3133   |
| 0        | 0        |
| 5.00E-04 | 0.5337   |
| 0        | 0.9978   |
| 0        | 0.9927   |
| 0        | 0.2472   |
| 0.002    | 0.8649   |
| 0        | 0.9999   |
| 0        | 0.4634   |
| 0        | 0.0097   |
| 0        | 0.5218   |
| 0.0103   | 0        |
| 0        | 0.9999   |
| 0.0103   | 0        |
| 0.0015   | 0        |
| 0.0187   | 1.00E-04 |
| 1.00E-04 | 0.7525   |
| 0        | 0.9915   |
| 0        | 0.9539   |
| 0        | 0        |
| 0        | 0.8355   |
| 0.0024   | 0.4668   |
| 0        | 0.9939   |
| 0        | 0.4358   |
| 4.00E-04 | 0.7555   |
| 0.0019   | 0.3415   |
| 1.00E-04 | 0.8989   |
| 4.00E-04 | 0        |



|          |          |
|----------|----------|
| 0        | 0        |
| 0        | 0.7764   |
| 0        | 0.6201   |
| 0        | 0.643    |
| 1.00E-04 | 0.0115   |
| 0.0041   | 0.2497   |
| 0        | 0        |
| 0.0021   | 0.5024   |
| 0        | 0        |
| 0.0067   | 0.233    |
| 0        | 0.8198   |
| 1.00E-04 | 0.5282   |
| 0        | 0.9618   |
| 0        | 0.4347   |
| 0.0178   | 0.6229   |
| 6.00E-04 | 0.8823   |
| 0.0022   | 0.7769   |
| 0.0051   | 0        |
| 0.0045   | 0.2993   |
| 0.0762   | 1.00E-04 |
| 0        | 0        |
| 0.0012   | 0        |
| 4.00E-04 | 0.7609   |
| 0        | 0        |
| 0        | 0.9627   |
| 0.0021   | 0.663    |
| 0.0043   | 0.787    |
| 8.00E-04 | 0.4777   |
| 0        | 0        |
| 0.0056   | 0.7235   |
| 0        | 0.5867   |
| 0        | 0.8139   |
| 0        | 0.9307   |
| 0.0727   | 0        |
| 0        | 0.9997   |
| 0.0013   | 0.4841   |
| 0        | 0        |
| 0.0399   | 0.4877   |
| 0        | 0.9995   |
| 0        | 0.9396   |
| 3.00E-04 | 0.0946   |
| 0.0097   | 0.7752   |
| 1.00E-04 | 0        |

|          |          |
|----------|----------|
| 7.00E-04 | 0.4386   |
| 0.002    | 0.7709   |
| 0        | 0.9997   |
| 5.00E-04 | 0.995    |
| 0        | 0.6052   |
| 0.0347   | 0        |
| 0        | 0.0845   |
| 0        | 0        |
| 0.0017   | 0.9632   |
| 6.00E-04 | 0.0095   |
| 5.00E-04 | 2.00E-04 |
| 0        | 0.7168   |
| 0.0019   | 0.5861   |
| 0        | 0.8596   |
| 0        | 0.578    |
| 0        | 0.8615   |
| 0        | 0.6904   |
| 1.00E-04 | 1.00E-04 |
| 8.00E-04 | 0.4792   |
| 1.00E-04 | 0        |
| 0.0049   | 0        |
| 0.0048   | 0.3392   |
| 0        | 0        |
| 1.00E-04 | 0.9962   |
| 0        | 0        |
| 0        | 5.00E-04 |
| 2.00E-04 | 0.9998   |
| 0.0023   | 0.6881   |
| 0.0065   | 0.9134   |
| 0        | 0        |
| 0.0012   | 0.5088   |
| 0        | 0.8789   |
| 0.0058   | 0.6954   |
| 0.0036   | 0.0463   |
| 0        | 0.8843   |
| 0        | 0.6014   |
| 0.0023   | 0.812    |
| 0.0019   | 0.9981   |
| 0        | 0.7587   |
| 0        | 0        |
| 1.00E-04 | 0.4819   |
| 5.00E-04 | 0.7829   |
| 0        | 2.00E-04 |

|          |          |
|----------|----------|
| 2.00E-04 | 0.2328   |
| 0.0045   | 0.3255   |
| 0        | 0        |
| 0        | 0.8697   |
| 6.00E-04 | 0.8786   |
| 0        | 0.2597   |
| 0        | 0        |
| 0.0022   | 0.5273   |
| 0        | 0        |
| 0.0217   | 0        |
| 0.0087   | 0        |
| 0.0039   | 0.8975   |
| 0        | 0.5012   |
| 0.0172   | 0.8597   |
| 0        | 0.9999   |
| 0.0205   | 0        |
| 0        | 0.8867   |
| 5.00E-04 | 0.7127   |
| 1.00E-04 | 0        |
| 1.00E-04 | 0.9471   |
| 0        | 0.4414   |
| 0.0105   | 0        |
| 1.00E-04 | 0.003    |
| 0        | 3.00E-04 |
| 0        | 0        |
| 0        | 0.887    |
| 0        | 0.9833   |
| 0.0013   | 0.1242   |
| 3.00E-04 | 0.8592   |
| 0.0288   | 0.9693   |
| 0        | 0.8868   |
| 5.00E-04 | 0.3695   |
| 0.004    | 0        |
| 0.0014   | 0        |
| 0        | 0.8654   |
| 0.0041   | 0.5756   |
| 2.00E-04 | 0.758    |
| 0        | 1.00E-04 |
| 0.0066   | 0.8762   |
| 0        | 0.9993   |
| 0        | 0.5828   |
| 7.00E-04 | 0.4789   |
| 8.00E-04 | 0.5362   |

|   |        |
|---|--------|
| 0 | 0.681  |
| 0 | 0.7061 |
| 0 | 0.5947 |
